# Supplementary material
Source: HighWire-hosted journal article supplement (https://bmjopen.bmj.com/content/15/3/e089548)
Supplement: inline-supplementary-material-5 [file inline-supplementary-material-5.xlsx]

## Sheet: Interviewers
		Main Findings	Main Findings	Main Findings	Main Findings	Main Findings	Main Findings	Main Findings	Main Findings	Main Findings	Main Findings	Main Findings	Main Findings
	GOOGLE TRANSLATION TO ENGLISH FOR REFERENCE
Sujet 0. Démographie et rôle dans le programme BHBC/ Topic 0. Demographics and Role in BHBC program	Topic 0. Demographics and Role in BHBC program
0.1 Quelles sont vos qualifications professionnelles en rapport avec votre rôle dans le programme BHBC ?/	0.1 What are your professional qualifications relevant to your role in the BHBC program?/
0.2 Pouvez-vous décrire votre rôle dans le programme BHBC et dans quelle institution votre rôle est joué ? Depuis combien de temps travaillez-vous au sein du programme BHBC et depuis quelle année ?	0.2 Can you describe your role in the BHBC program and in which institution your role is played? How long have you been working in the BHBC program and since what year?
Dans quel district vous traveillez?	What district do you work in?
Thème 1. Parcours patient et influence de l'initiative BHBC sur le système de santé local	Theme 1. Patient pathway and influence of the BHBC initiative on the local health system
1.0 À quelle étape du parcours patient avez-vous été directement impliqué : dépistage, diagnostic, traitement et/ou contrôle des patients hypertendus dans l'Initiative BHBC ?	1.0 At what stage of the patient journey were you directly involved: screening, diagnosis, treatment and/or monitoring of hypertensive patients in the BHBC Initiative?
1.01 Pouvez-vous expliquer comment, d'après votre expérience, les patients hypertendus ont été dépistés lors de l'initiative Better Hearts Better Cities ? Veuillez le décrire tel que vous l'avez vu dans la réalité.	1.01 Can you explain how, in your experience, hypertensive patients were screened during the Better Hearts Better Cities initiative? Please describe it as you saw it in reality.
1.02 Pouvez-vous expliquer comment, selon votre expérience, les patients ont été diagnostiqués lors de l'initiative Better Hearts Better Cities ? Veuillez le décrire tel que vous l'avez vu dans la réalité.	1.02 Can you explain how, in your experience, patients were diagnosed during the Better Hearts Better Cities initiative? Please describe it as you saw it in reality.
1.03 Pouvez-vous expliquer comment, d'après votre expérience, les patients ont été traités lors de l'initiative Better Hearts Better Cities ? Veuillez le décrire tel que vous l'avez vu dans la réalité.	1.03 Can you explain how, in your experience, patients were treated during the Better Hearts Better Cities initiative? Please describe it as you saw it in reality.
1.04 Pouvez-vous expliquer comment le parcours du patient s'est amélioré grâce à l'initiative BHBC ?	1.04 Can you explain how the patient journey has improved as a result of the BHBC initiative?
Thème 2. Expliquer la cascade de données sur les soins	Theme 2. Explaining the healthcare data cascade
2.01 Qu'est-ce qui a permis de dépister les patients ? Qu'est-ce qui a empêché les patients de se faire dépister ? Pouvez-vous identifier un goulot d'étranglement dans le parcours patient lié au dépistage ?	2.01 What made it possible to screen patients? What prevented patients from getting screened? Can you identify a bottleneck in the patient pathway related to screening?
2.02 Qu'est-ce qui a permis de diagnostiquer les patients ? Qu'est-ce qui a empêché les patients d'être diagnostiqués ? Pouvez-vous identifier un goulot d'étranglement dans le parcours patient lié au diagnostic ?	2.02 What enabled patients to be diagnosed? What prevented patients from being diagnosed? Can you identify a bottleneck in the patient journey related to diagnosis?
2.03 Qu'est-ce qui a permis aux patients d'être soignés ? Qu'est-ce qui a empêché les patients d'être traités? Pouvez-vous identifier un goulot d'étranglement dans le parcours patient lié au traitement ?	2.03 What enabled patients to be treated? What prevented patients from being treated? Can you identify a bottleneck in the patient pathway related to treatment?
2.04 Qu'est-ce qui a permis aux patients de contrôler leur HTN ? Qu'est-ce qui a empêché les patients de contrôler leur HTN ? Pouvez-vous identifier un goulot d'étranglement dans le parcours patient lié au contrôle ?	2.04 What enabled patients to control their HTN? What prevented patients from controlling their HTN? Can you identify a bottleneck in the patient pathway related to control?
Sujet 3 : Équité	Topic 3: Equity
3.01 Selon vous, quel type de patients qui sont les moins susceptibles de progresser le long de la cascade de soins ? (Probes: hommes vs. femmes)	3.01 What type of patients do you think are least likely to progress along the care cascade? (Probes: men vs. women)
Sujet 4 : Avenir de BHBC	Topic 4: Future of BHBC
4.01 Que pensez-vous que les prochaines étapes de l'initiative devraient inclure pour améliorer le processus ?	4.01 What do you think the next steps of the initiative should include to improve the process?
Other	Other
Autres commentaires	Other comments
